# Supplementary material
Source: PubMed Central journal article supplement (PMC1761982)
Supplement: plntphys_pp.106.089383_1.pdf [file plntphys_pp.106.089383_1.pdf]

Table S1: Gas exchange traits from studies that assessed a nutrient limitation treatment, a water limitation treatment, or both. If no treatment is designated (i.e. “---”) then all plants in that study received sufficient levels of that resource. Trait values are  $\bar{x} \pm 1$  SE (presented as  $-$  SE and then  $+$  SE when unequal due to back transformation after log). F-values and associated degrees of freedom ( $F_{df\ num, df\ denom.}$ ) are presented for each trait and model effect (PROC MIXED ANOVA, block as random). F-values in bold indicate statistical significance (\*  $P < 0.05$ , \*\*  $P < 0.01$ , \*\*\*  $P < 0.001$ ).

| Study and Species     | Nutrient treatment     | Water treatment | $g_{night}$ (mol m <sup>-2</sup> s <sup>-1</sup> ) | $E_{night}$ (mmol m <sup>-2</sup> s <sup>-1</sup> ) | $g_{day}$ (mol m <sup>-2</sup> s <sup>-1</sup> ) | $E_{day}$ (mmol m <sup>-2</sup> s <sup>-1</sup> ) | Photosynthesis (μmol m <sup>-2</sup> s <sup>-1</sup> ) |
|-----------------------|------------------------|-----------------|----------------------------------------------------|-----------------------------------------------------|--------------------------------------------------|---------------------------------------------------|--------------------------------------------------------|
| <i>Model effects</i>  |                        |                 |                                                    |                                                     |                                                  |                                                   |                                                        |
| <b>Fall 2003-1</b>    |                        |                 |                                                    |                                                     |                                                  |                                                   |                                                        |
| <i>H. annuus</i>      | sufficient             | ---             | 0.102 ± 0.017                                      | 1.36 ± 0.17                                         | ---                                              | ---                                               | ---                                                    |
|                       | limiting               | ---             | 0.102 ± 0.017                                      | 1.42 ± 0.17                                         | ---                                              | ---                                               | ---                                                    |
|                       | <i>Nutrient effect</i> |                 | 0.00 <sub>1,10</sub>                               | 0.06 <sub>1,10</sub>                                | ---                                              | ---                                               | ---                                                    |
| <i>H. anomalus</i>    | sufficient             | ---             | 0.166 ± 0.021                                      | 1.69 ± 0.16                                         | ---                                              | ---                                               | ---                                                    |
|                       | limiting               | ---             | 0.130 ± 0.021                                      | 1.47 ± 0.16                                         | ---                                              | ---                                               | ---                                                    |
|                       | <i>Nutrient effect</i> |                 | 2.8 <sub>1,10</sub>                                | 1.85 <sub>1,10</sub>                                | ---                                              | ---                                               | ---                                                    |
| <i>H. deserticola</i> | sufficient             | ---             | 0.225 ± 0.052                                      | 2.46 ± 0.45                                         | ---                                              | ---                                               | ---                                                    |
|                       | limiting               | ---             | 0.134 ± 0.062                                      | 1.84 ± 0.53                                         | ---                                              | ---                                               | ---                                                    |
|                       | <i>Nutrient effect</i> |                 | 1.27 <sub>1,8</sub>                                | 0.82 <sub>1,8</sub>                                 | ---                                              | ---                                               | ---                                                    |
| <i>H. petiolaris</i>  | sufficient             | ---             | 0.121 ± 0.022                                      | 1.57 ± 0.25                                         | ---                                              | ---                                               | ---                                                    |
|                       | limiting               | ---             | 0.066 ± 0.024                                      | 1.01 ± 0.27                                         | ---                                              | ---                                               | ---                                                    |
|                       | <i>Nutrient effect</i> |                 | 3.78 <sub>1,9</sub>                                | 3.54 <sub>1,9</sub>                                 | ---                                              | ---                                               | ---                                                    |
| <b>Fall 2003-2</b>    |                        |                 |                                                    |                                                     |                                                  |                                                   |                                                        |
| <i>H. annuus</i> dom. | sufficient             | sufficient      | 0.035 ± 0.004                                      | 0.42 -0.07, +0.09                                   | 1.272 ± 0.161                                    | 7.79 ± 0.80                                       | 27.8 ± 2.5                                             |
|                       | sufficient             | limiting        | 0.012 ± 0.004                                      | 0.15 -0.03, +0.03                                   | 0.460 ± 0.161                                    | 4.04 ± 0.80                                       | 12.8 ± 2.5                                             |
|                       | limiting               | sufficient      | 0.023 ± 0.004                                      | 0.29 -0.05, +0.06                                   | 1.201 ± 0.161                                    | 8.44 ± 0.80                                       | 26.0 ± 2.5                                             |
|                       | limiting               | limiting        | 0.014 ± 0.004                                      | 0.20 -0.03, +0.04                                   | 1.086 ± 0.161                                    | 8.12 ± 0.80                                       | 24.5 ± 2.5                                             |
|                       | <i>Water effect</i>    |                 | <b>20.81</b> <sub>1,30</sub> ***                   | <b>14.86</b> <sub>1,30</sub> ***                    | <b>8.25</b> <sub>1,30</sub> **                   | <b>6.84</b> <sub>1,30</sub> *                     | <b>10.66</b> <sub>1,30</sub> **                        |
|                       | <i>Nutrient effect</i> |                 | 1.74 <sub>1,30</sub>                               | 0.05 <sub>1,30</sub>                                | 2.97 <sub>1,30</sub>                             | <b>9.24</b> <sub>1,30</sub> **                    | 3.92 <sub>1,30</sub>                                   |
|                       | <i>Water*nutrient</i>  |                 | 4.00 <sub>1,30</sub>                               | 3.50 <sub>1,30</sub>                                | <b>4.66</b> <sub>1,30</sub> *                    | <b>4.91</b> <sub>1,30</sub> *                     | <b>7.28</b> <sub>1,30</sub> *                          |

|                       |                         |            |                                   |                                   |                                   |                                   |                                   |
|-----------------------|-------------------------|------------|-----------------------------------|-----------------------------------|-----------------------------------|-----------------------------------|-----------------------------------|
| <b>Fall 2004-1</b>    |                         |            |                                   |                                   |                                   |                                   |                                   |
| <i>H. annuus</i>      | sufficient              | ---        | 0.124 ± 0.020                     | 0.61 ± 0.24                       | 0.924 ± 0.151                     | 18.86 ± 1.525                     | 19.9 ± 1.8                        |
|                       | limiting                | ---        | 0.104 ± 0.019                     | 1.35 ± 0.22                       | 0.645 ± 0.141                     | 14.53 ± 1.426                     | 18.4 ± 1.7                        |
| <i>H. anomalus</i>    | sufficient              | ---        | 0.119 ± 0.019                     | 1.65 ± 0.23                       | 0.771 ± 0.144                     | 18.11 ± 1.426                     | 18.9 ± 1.7                        |
|                       | limiting                | ---        | 0.134 ± 0.021                     | 1.86 ± 0.25                       | 0.635 ± 0.157                     | 15.36 ± 1.647                     | 21.2 ± 1.9                        |
| <i>H. deserticola</i> | sufficient              | ---        | 0.148 ± 0.019                     | 1.88 ± 0.23                       | 0.837 ± 0.145                     | 16.57 ± 1.525                     | 18.2 ± 1.8                        |
|                       | limiting                | ---        | 0.135 ± 0.018                     | 1.80 ± 0.21                       | 1.026 ± 0.136                     | 18.66 ± 1.345                     | 21.1 ± 1.6                        |
| <i>H. petiolaris</i>  | sufficient              | ---        | 0.086 ± 0.019                     | 1.14 ± 0.23                       | 0.929 ± 0.144                     | 18.30 ± 1.426                     | 20.5 ± 1.7                        |
|                       | limiting                | ---        | 0.105 ± 0.021                     | 1.44 ± 0.24                       | 0.756 ± 0.155                     | 16.23 ± 1.525                     | 17.8 ± 1.8                        |
|                       | <i>Nitrate effect</i>   |            | 0.00 <sub>1, 51</sub>             | 0.09 <sub>1, 51</sub>             | 1.41 <sub>1, 51</sub>             | 2.83 <sub>1, 51</sub>             | 0.05 <sub>1, 50</sub>             |
|                       | <i>Species effect</i>   |            | <b>3.08</b> <sub>3, 51</sub> *    | <b>3.03</b> <sub>3, 51</sub> *    | 1.24 <sub>3, 51</sub>             | 0.18 <sub>3, 51</sub>             | 0.12 <sub>3, 50</sub>             |
|                       | <i>Nitrate*species</i>  |            | 0.76 <sub>3, 51</sub>             | 0.79 <sub>3, 51</sub>             | 1.46 <sub>3, 51</sub>             | 1.77 <sub>3, 51</sub>             | 1.28 <sub>3, 50</sub>             |
|                       | <i>PAR (covariate)</i>  |            |                                   |                                   |                                   |                                   | <b>24.18</b> <sub>1, 50</sub> *** |
| <b>Fall 2004-2</b>    |                         |            |                                   |                                   |                                   |                                   |                                   |
| <i>H. annuus</i>      | ---                     | sufficient | 0.060 ± 0.007                     | 0.74 ± 0.08                       | 1.489 ± 0.121                     | 18.46 ± 1.37                      | 32.04 ± 2.1                       |
|                       | ---                     | limiting   | 0.022 ± 0.007                     | 0.32 ± 0.08                       | 0.365 ± 0.121                     | 8.34 ± 1.37                       | 18.5 ± 2.1                        |
| <i>H. annuus</i> Hopi | ---                     | sufficient | 0.053 ± 0.007                     | 0.68 ± 0.08                       | 1.029 ± 0.121                     | 16.40 ± 1.37                      | 25.2 ± 2.1                        |
|                       | ---                     | limiting   | 0.029 ± 0.007                     | 0.41 ± 0.09                       | 0.243 ± 0.128                     | 6.54 ± 1.45                       | 14.2 ± 2.2                        |
|                       | <i>Water effect</i>     |            | <b>17.64</b> <sub>29, 1</sub> *** | <b>16.77</b> <sub>29, 1</sub> *** | <b>60.28</b> <sub>29, 1</sub> *** | <b>51.82</b> <sub>29, 1</sub> *** | <b>32.73</b> <sub>29, 1</sub> *** |
|                       | <i>Accession effect</i> |            | 0.0 <sub>29, 1</sub>              | 0.02 <sub>29, 1</sub>             | 5.57 <sub>29, 1</sub> *           | 1.29 <sub>29, 1</sub>             | <b>6.83</b> <sub>29, 1</sub> *    |
|                       | <i>Water*accession</i>  |            | 0.92 <sub>29, 1</sub>             | 0.81 <sub>29, 1</sub>             | 1.88 <sub>29, 1</sub>             | 0.01 <sub>29, 1</sub>             | 0.34 <sub>29, 1</sub>             |
| <b>Spring 2005</b>    |                         |            |                                   |                                   |                                   |                                   |                                   |
| <i>H. annuus</i>      | sufficient              | ---        | 0.104 -0.012, +0.013              | 1.20 -0.14, +0.16                 | ---                               | ---                               | ---                               |
|                       | limiting                | ---        | 0.082 -0.009, +0.01               | 0.98 -0.11, +0.13                 | ---                               | ---                               | ---                               |
|                       | <i>Nitrate effect</i>   |            | 3.96 <sub>1, 11</sub>             | 3.92 <sub>1, 11</sub>             | ---                               | ---                               | ---                               |
|                       | <i>Leaf age effect</i>  |            | 0.83 <sub>1, 321</sub>            | 0.57 <sub>1, 321</sub>            | ---                               | ---                               | ---                               |
| <b>Summer 2005</b>    |                         |            |                                   |                                   |                                   |                                   |                                   |
| <i>H. annuus</i>      | sufficient              | sufficient | 0.079 -0.008, +0.009              | 0.55 -0.04, +0.05                 | ---                               | ---                               | ---                               |
|                       | sufficient              | limiting   | 0.027 ± 0.003                     | 0.22 ± 0.02                       | ---                               | ---                               | ---                               |
|                       | limiting                | sufficient | 0.096 -0.010, +0.011              | 0.61 ± 0.05                       | ---                               | ---                               | ---                               |
|                       | limiting                | limiting   | 0.034 -0.003, +0.004              | 0.27 ± 0.02                       | ---                               | ---                               | ---                               |
|                       | <i>Water effect</i>     |            | <b>93.88</b> <sub>1, 31</sub> *** | <b>101.3</b> <sub>1, 31</sub> *** | ---                               | ---                               | ---                               |
|                       | <i>Nitrate effect</i>   |            | 3.57 <sub>1, 31</sub>             | 2.98 <sub>1, 31</sub>             | ---                               | ---                               | ---                               |
|                       | <i>Water*nitrate</i>    |            | 0.02 <sub>1, 31</sub>             | 0.28 <sub>1, 31</sub>             | ---                               | ---                               | ---                               |
| <b>Fall 2005-1</b>    |                         |            |                                   |                                   |                                   |                                   |                                   |
|                       | sufficient;             |            |                                   |                                   |                                   |                                   |                                   |

|                    |                          |                     |                                  |                                  |                                   |                                    |                                   |
|--------------------|--------------------------|---------------------|----------------------------------|----------------------------------|-----------------------------------|------------------------------------|-----------------------------------|
| <i>H. annuus</i>   | 15.5 wks age             | ---                 | 0.037 -0.009, +0.011             | 0.50 -0.11, +0.14                | ---                               | ---                                | ---                               |
|                    | sufficient;              |                     |                                  |                                  |                                   |                                    |                                   |
|                    | 10 wks age               | ---                 | 0.037 -0.009, +0.012             | 0.49 -0.11, +0.15                | ---                               | ---                                | ---                               |
|                    | sufficient;              |                     |                                  |                                  |                                   |                                    |                                   |
|                    | 5.5 wks age              | ---                 | 0.098 -0.023, +0.03              | 1.19 -0.26, +0.33                | ---                               | ---                                | ---                               |
|                    | limiting;                |                     |                                  |                                  |                                   |                                    |                                   |
|                    | 15.5 wks age             | ---                 | 0.054 -0.013, +0.017             | 0.72 -0.16, +0.20                | ---                               | ---                                | ---                               |
|                    | limiting;                |                     |                                  |                                  |                                   |                                    |                                   |
|                    | 10 wks age               | ---                 | 0.037 -0.009, +0.011             | 0.49 -0.11, +0.14                | ---                               | ---                                | ---                               |
|                    | limiting;                |                     |                                  |                                  |                                   |                                    |                                   |
|                    | 5.5 wks age              | ---                 | 0.153 -0.036, +0.047             | 1.76 -0.39, +0.50                | ---                               | ---                                | ---                               |
|                    | <i>Nitrate effect</i>    |                     | 2.39 <sub>1,46</sub>             | 2.25 <sub>1,46</sub>             | ---                               | ---                                | ---                               |
|                    | <i>Plant age effect</i>  |                     | <b>17.45</b> <sub>2,46</sub> *** | <b>15.96</b> <sub>2,46</sub> *** | ---                               | ---                                | ---                               |
|                    | <i>Nitrate*plant age</i> |                     | 0.55 <sub>2,46</sub>             | 0.58 <sub>2,46</sub>             | ---                               | ---                                | ---                               |
| <b>Fall 2005-2</b> |                          |                     |                                  |                                  |                                   |                                    |                                   |
| <i>H. annuus</i>   | ---                      | sufficient          | 0.072 -0.021, +0.030             | 0.58 -0.16, +0.23                | 1.854 -0.345, +0.423              | 15.15 ± 0.29                       | 34.9 ± 1.0                        |
|                    | ---                      | limiting            | 0.003 ± 0.001                    | 0.03 ± 0.01                      | 0.019 -0.004, +0.005              | 0.60 ± 0.30                        | 3.8 ± 1.1                         |
|                    |                          | <i>Water effect</i> | <b>38.55</b> <sub>1,19</sub> *** | <b>38.01</b> <sub>1,19</sub> *** | <b>236.96</b> <sub>1,19</sub> *** | <b>1211.89</b> <sub>1,19</sub> *** | <b>443.65</b> <sub>1,19</sub> *** |
